# Supplementary material
Source: Springer Nature journal article supplement (https://www.springermedizin.de/resource/supplementary/13063_2013_1928_MOESM1_ESM.pdf/9621690)

Depression Trial

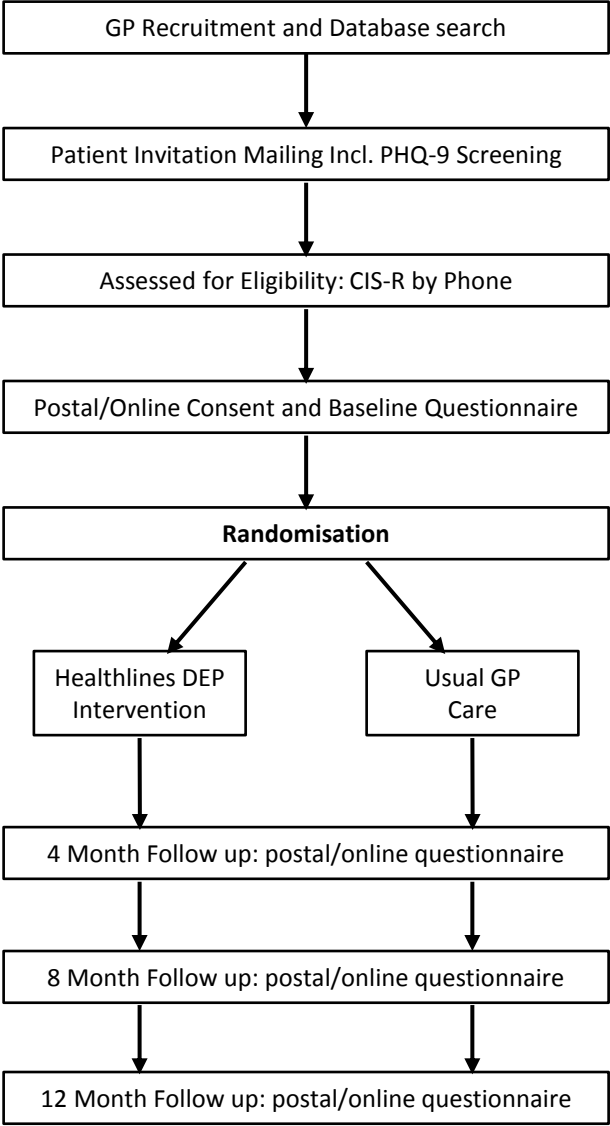

CVD Risk Trial

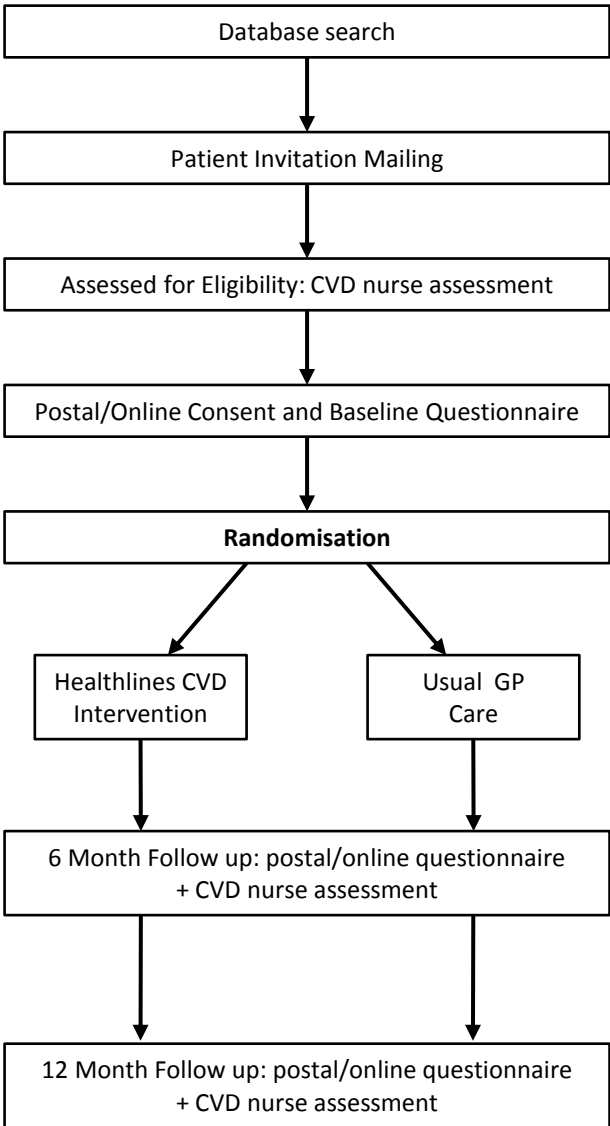

Supplement: MOESM1 [file 9621690]
